# Supplementary material
Source: PubMed Central journal article supplement (PMC1851041)

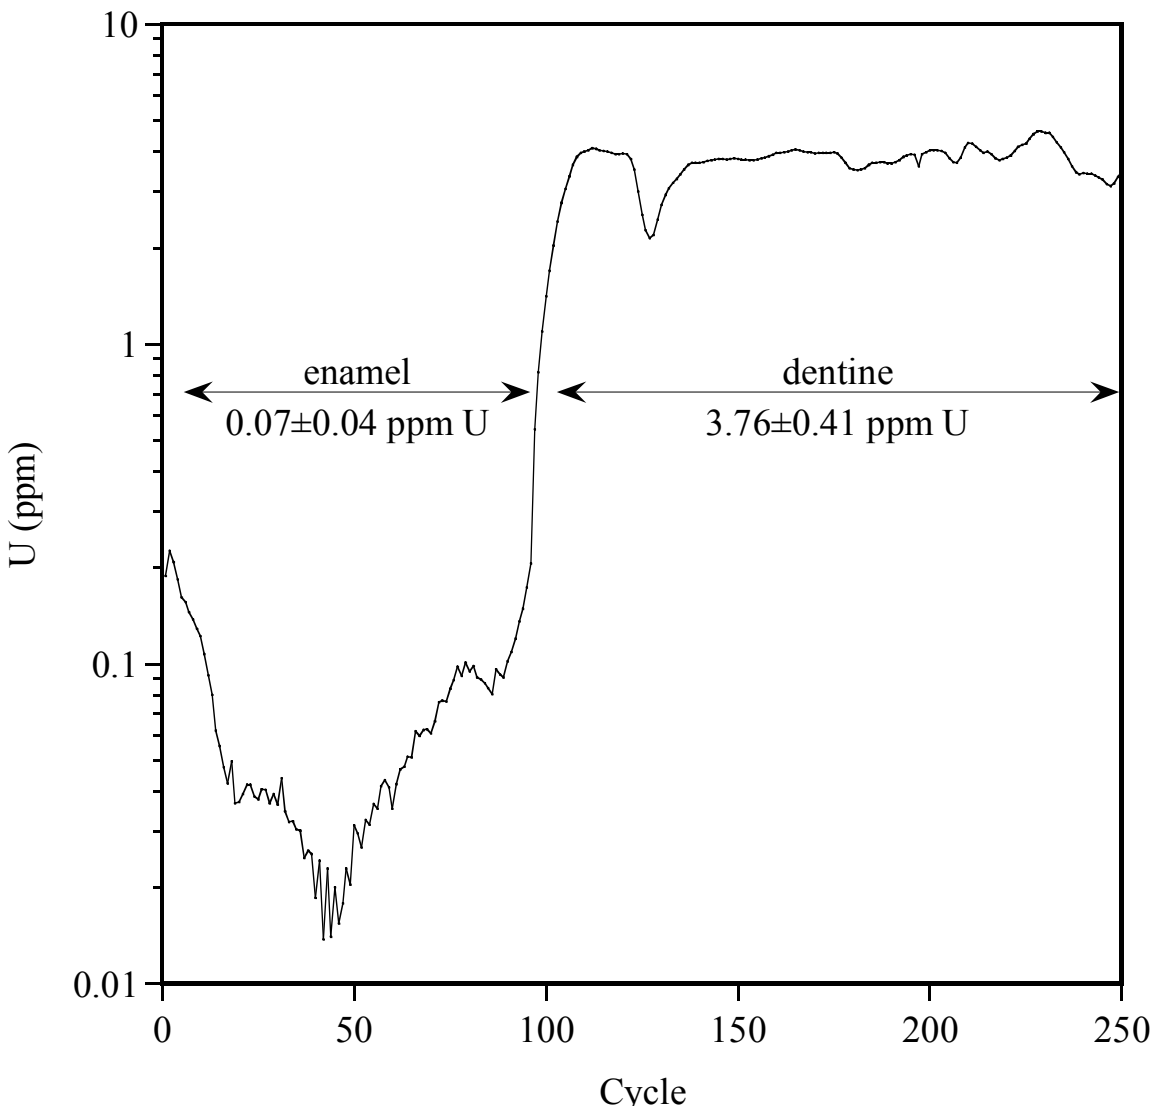

Supplement: pnas_0700747104_1.pdf [file pnas_0700747104_1.pdf]

### Irhoud Natural Spectra

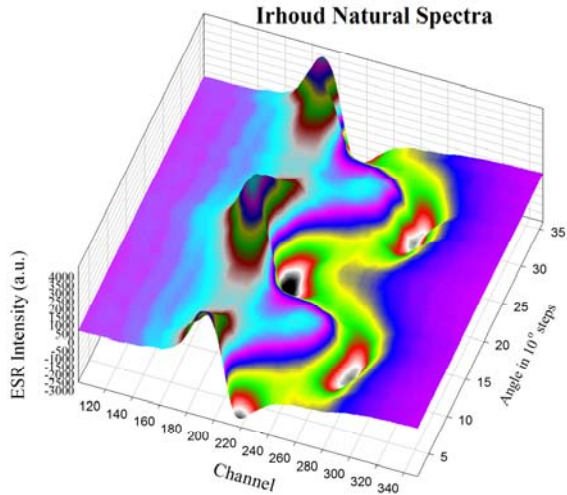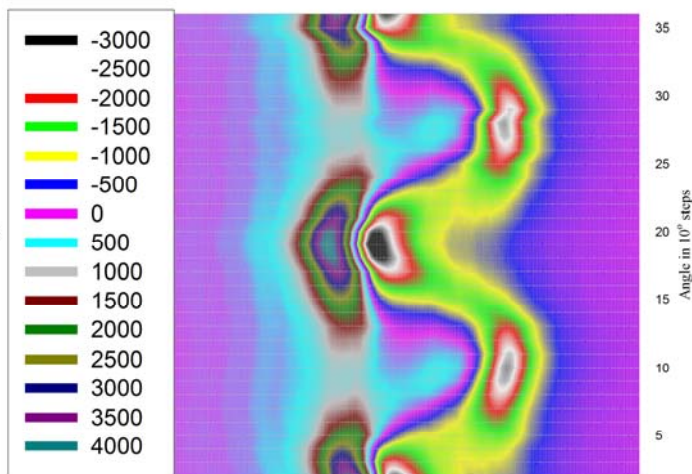

### Irhoud Irradiation Spectra

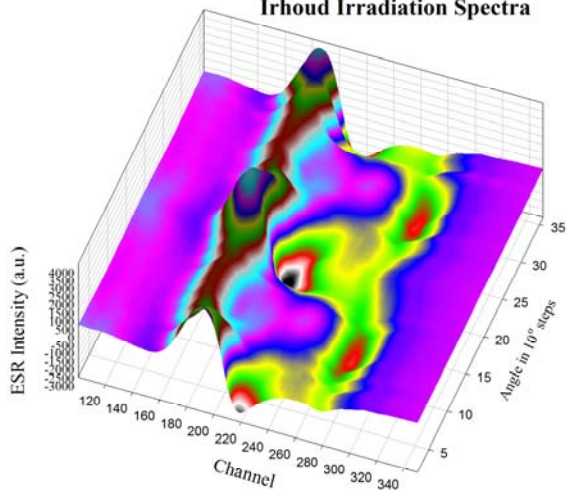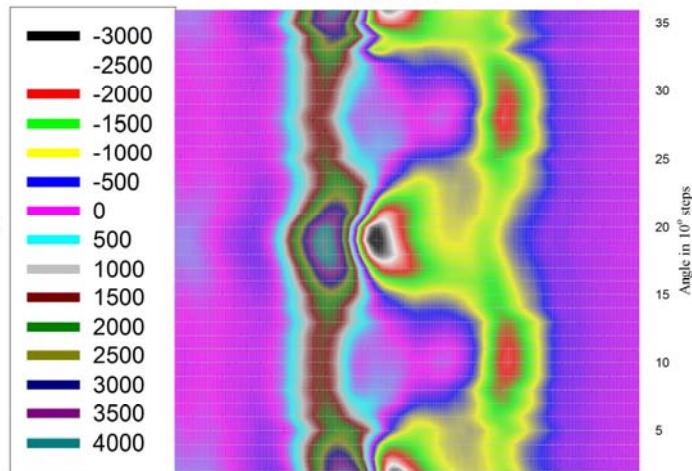

Supplement: pnas_0700747104_2.pdf [file pnas_0700747104_2.pdf]

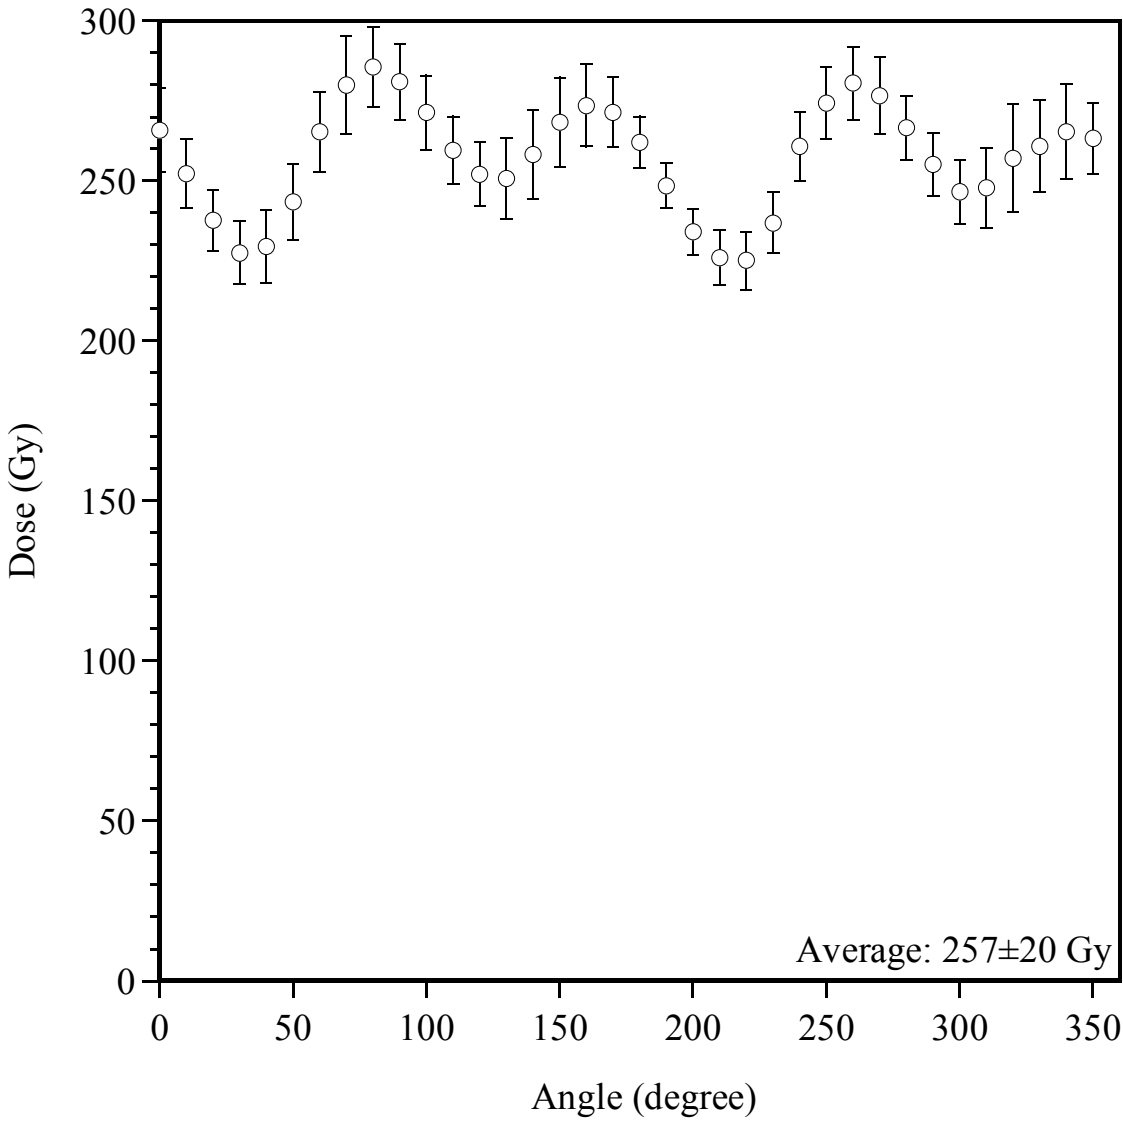

Supplement: pnas_0700747104_3.pdf [file pnas_0700747104_3.pdf]

**A**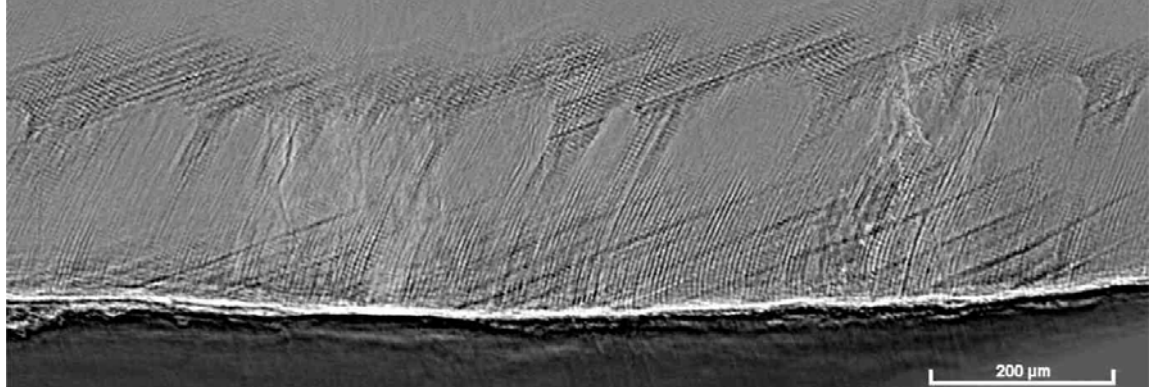**B**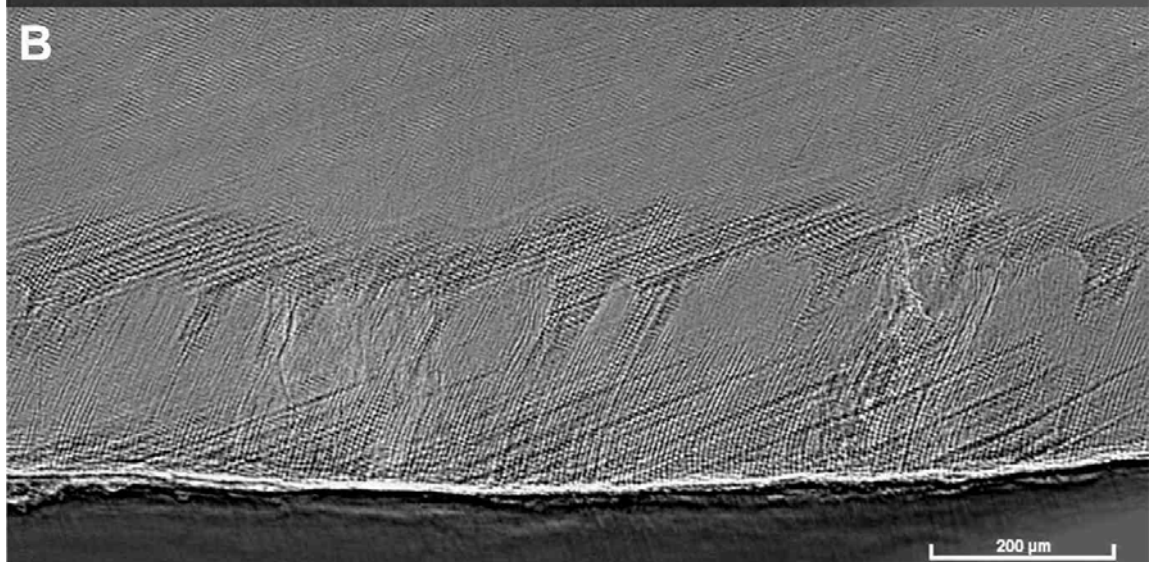**C**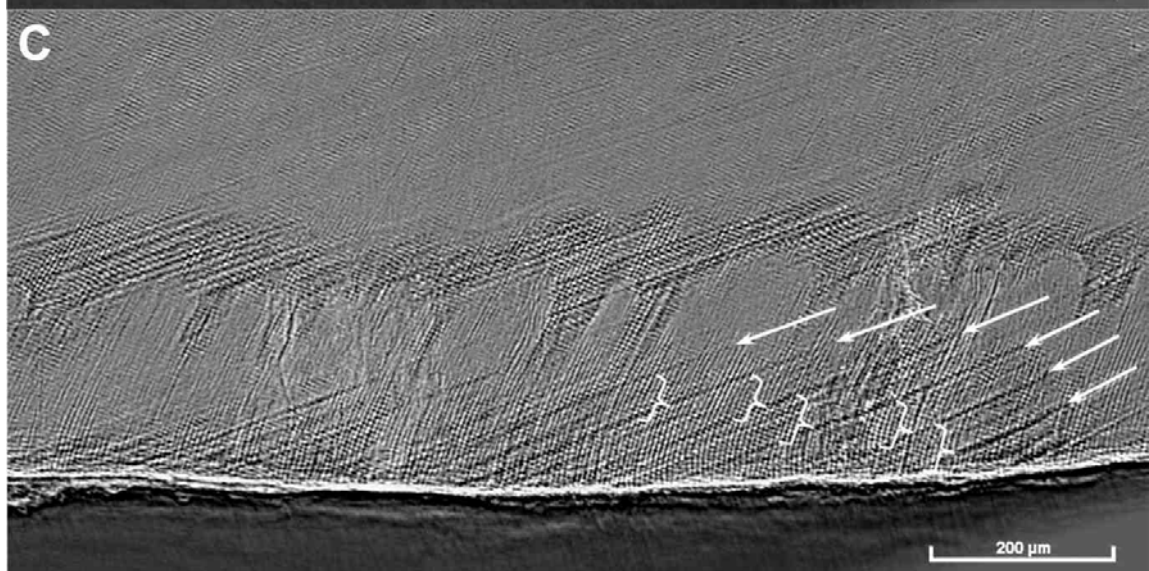

Supplement: pnas_0700747104_4.pdf [file pnas_0700747104_4.pdf]
